# Supplementary material for: Study of the surface reaction kinetics of (La,Sr)MnO3−δ oxygen carriers for solar thermochemical fuel production
Source: Royal Society of Chemistry journal article supplement (doi:10.1039/c8ta01939h), 2018-01-01
Supplement: c8ta01939h1.pdf [file c8ta01939h1.pdf]

### Electronic Supplementary Information (ESI)

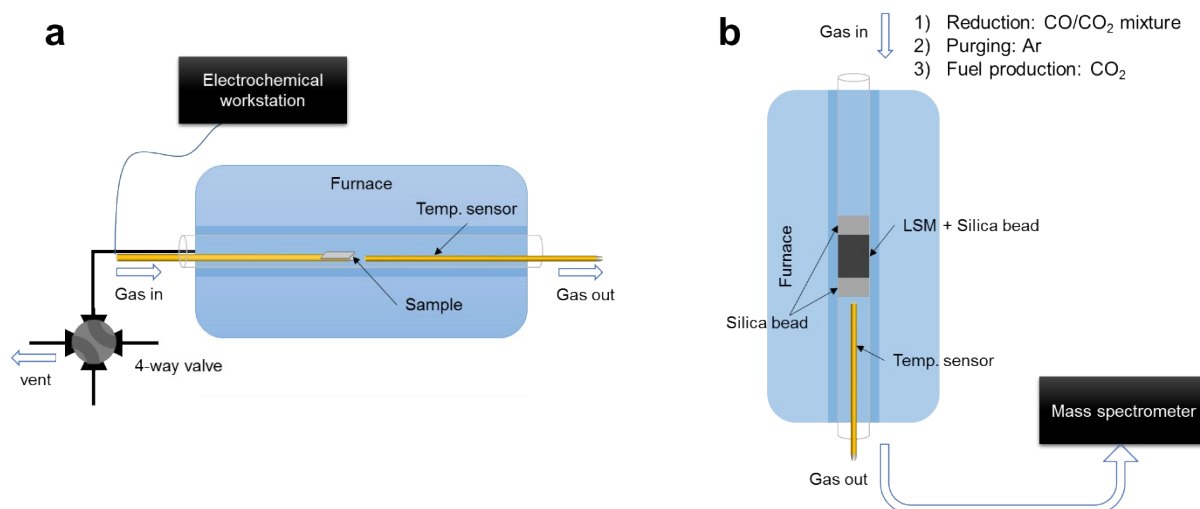

**Figure S1.** Schematic diagrams of (a) the electrical conductivity relaxation process and (b) the isothermal reactor.

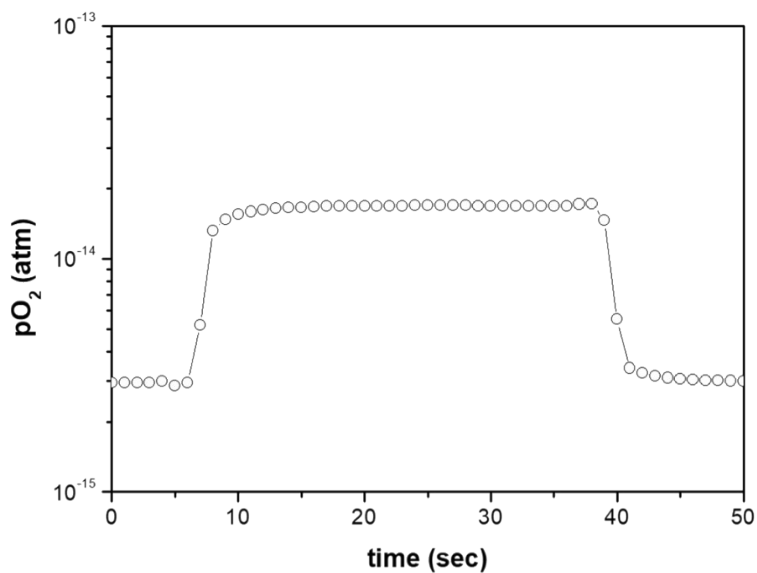

**Figure S2.** Oxygen partial pressure change upon a sudden change in the gas mixture flowing into the reactor; the gas was switched within 5 seconds, much faster than the electrical conductivity relaxation time.

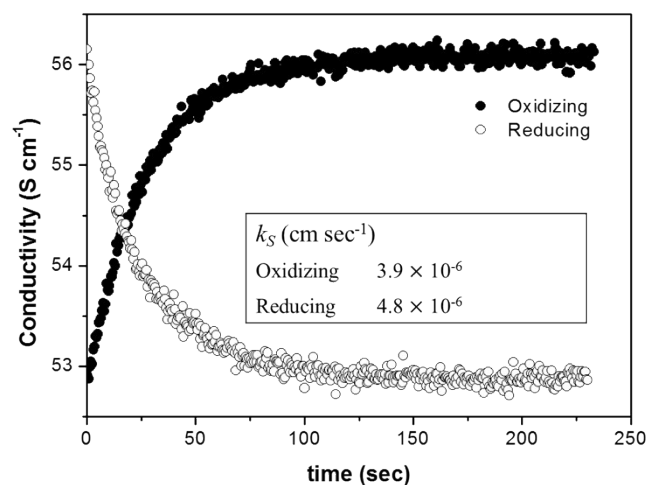

**Figure S3.** Raw conductivity relaxation profiles of  $\text{La}_{1-x}\text{Sr}_x\text{MnO}_{3-\delta}$  ( $x = 0.2$ ) along reducing and oxidizing directions for a  $p\text{O}_2$  switch between  $2.9 \times 10^{-15}$  atm and  $1.5 \times 10^{-14}$  atm at  $800^\circ\text{C}$  using  $\text{CO}/\text{CO}_2$ . The relaxation profiles are almost identical, indicating that the  $p\text{O}_2$  change is small enough to ensure that  $k_S$  values are identical along both directions and that the system response is linear.

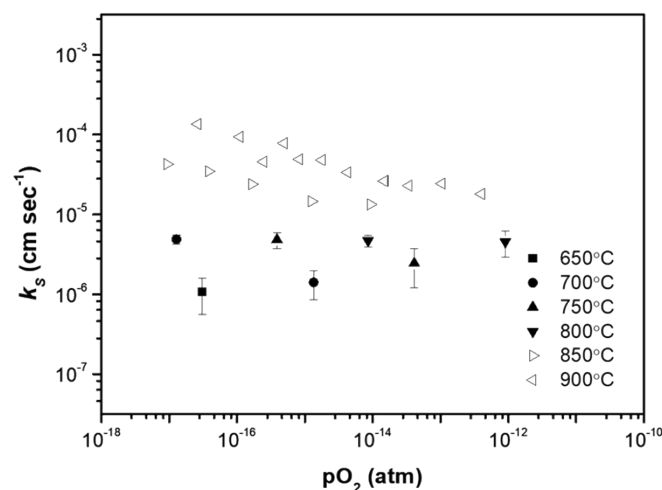

**Figure S4.** Comparison of the  $k_S$  values of  $\text{La}_{1-x}\text{Sr}_x\text{MnO}_{3-\delta}$  ( $x = 0.2$ ) in the literature (opened) and in this study (closed).<sup>20</sup> The values here are in agreement with those in the literature.

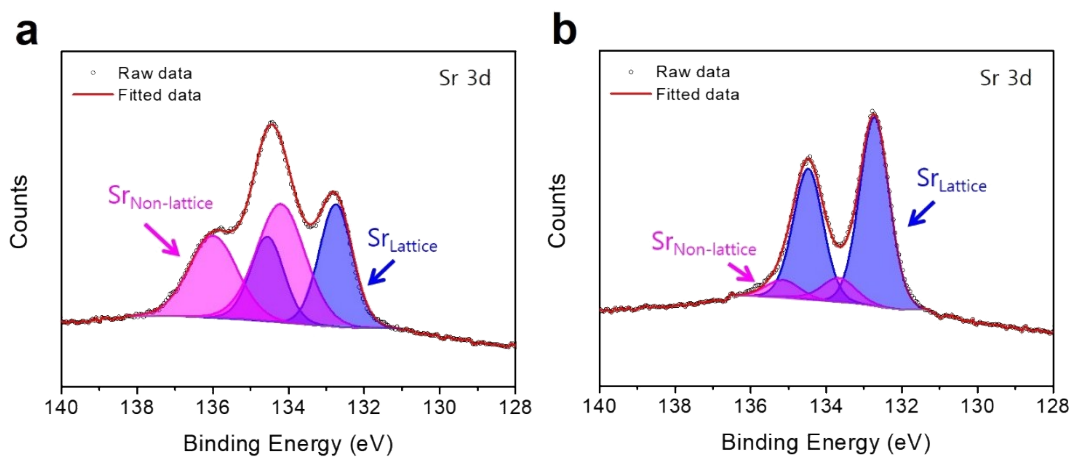

**Figure S5.** Sr 3d spectra of  $\text{La}_{1-x}\text{Sr}_x\text{MnO}_{3-\delta}$  ( $x = 0.2$ ) films (a) before and (b) after the removal of the outmost layers by chemical etching after the electrical conductivity relaxation measurements.

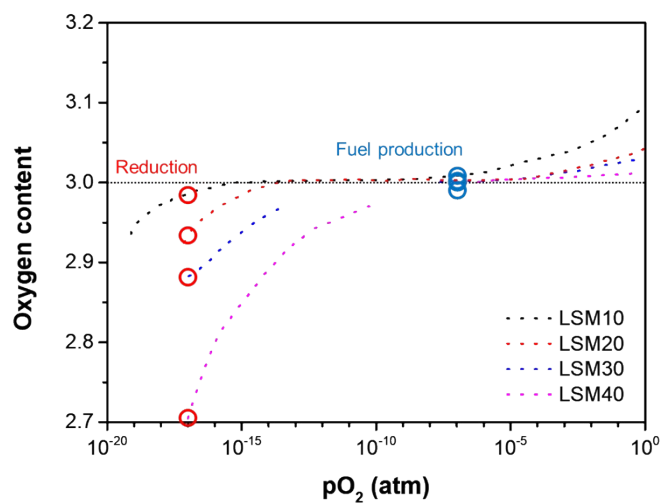

**Figure S6.** Oxygen content in  $\text{La}_{1-x}\text{Sr}_x\text{MnO}_{3-\delta}$  ( $x = 0.1, 0.2, 0.3, 0.4$ ) at  $800^\circ\text{C}$ . During the feasibility test of fuel production, cycling was performed between  $p\text{O}_2$  levels of  $1.0 \times 10^{-17}$  atm ( $\text{CO}/\text{CO}_2$  mixture) and  $1.0 \times 10^{-7}$  atm ( $\text{CO}_2$ ). Reproduced from Ref. 9 with permission from The Royal Society of Chemistry.

(mol/mol LSM)

| Sr content | Powder |      |      | Films |      |      |
|------------|--------|------|------|-------|------|------|
|            | La     | Sr   | Mn   | La    | Sr   | Mn   |
| 0.1        | 0.77   | 0.11 | 1.12 | 0.83  | 0.10 | 1.07 |
| 0.2        | 0.69   | 0.19 | 1.12 | 0.73  | 0.20 | 1.07 |
| 0.3        | 0.60   | 0.29 | 1.11 | 0.68  | 0.29 | 1.03 |
| 0.4        | 0.51   | 0.39 | 1.10 | 0.57  | 0.39 | 1.04 |

**Table S1.** Inductively coupled plasma mass spectrometry (ICP-MS) composition analysis of the metal elements in the  $\text{La}_{1-x}\text{Sr}_x\text{MnO}_{3-\delta}$  powders and films.

| Sr content | Before/After chemical etching |             |             |
|------------|-------------------------------|-------------|-------------|
|            | La                            | Sr          | Mn          |
| 0.1        | 60.12/41.14                   | 8.60/5.09   | 31.28/53.77 |
| 0.2        | 46.89/37.13                   | 16.38/10.20 | 36.70/52.64 |
| 0.3        | 34.87/34.30                   | 18.43/12.19 | 46.66/53.48 |
| 0.4        | 39.26/30.97                   | 17.71/16.18 | 43.00/52.85 |

**Table S2.** Chemical composition of the surface of  $\text{La}_{1-x}\text{Sr}_x\text{MnO}_{3-\delta}$  films before and after chemical etching as analyzed by X-ray photoelectron spectroscopy (XPS).
